# Supplementary material
Source: Copernicus journal article supplement (doi:10.5194/egusphere-2023-1324)
Supplement: Supplementary file [file egusphere-2023-1324-AC1-supplement.pdf]

| a          |            | Predicted areas |           |            |            |                 | b          |            | Predicted areas |           |            |          |   |
|------------|------------|-----------------|-----------|------------|------------|-----------------|------------|------------|-----------------|-----------|------------|----------|---|
| True areas | Futuna     | 80              |           |            |            | 20              | True areas | Futuna     | 4               |           |            |          | 1 |
|            | Lau Basin  | 40              | 60        |            |            |                 |            | Lau Basin  | 2               | 3         |            |          |   |
|            | Mangatolo  |                 | 50        | 50         |            |                 |            | Mangatolo  |                 | 1         | 1          |          |   |
|            | North Fiji |                 |           |            | 100        |                 |            | North Fiji |                 |           |            | 2        |   |
|            | Woodlark   | 33.3            |           |            |            | 66.7            |            | Woodlark   | 1               |           |            |          | 2 |
|            |            | Futuna          | Lau Basin | Mangatolo  | North Fiji | Woodlark        |            | Futuna     | Lau Basin       | Mangatolo | North Fiji | Woodlark |   |
|            |            |                 |           |            |            |                 |            |            |                 |           |            |          |   |
| c          |            | Predicted areas |           | d          |            | Predicted areas |            |            |                 |           |            |          |   |
| True areas | Manus      | 91.7            | 8.3       | True areas | Manus      | 11              | 1          |            |                 |           |            |          |   |
|            | Woodlark   | 33.3            | 66.7      |            | Woodlark   | 1               | 2          |            |                 |           |            |          |   |
|            |            | Manus           | Woodlark  |            |            | Manus           | Woodlark   |            |                 |           |            |          |   |

**Figure 1:** Confusion matrices of the classification of habitat water measurements using Mg, Mn, Fe, Cu, Zn, and Sr for Eastern areas (a-b) and Western areas (c-d). For each line, corresponding to one area, classification rates (a, c) and number of measures (b, d) are indicated, with correct classification on the diagonal in blue and wrong classification outside the diagonal in red.
